# Supplementary material for: An environmentally adaptive quasi-solid-state zinc-ion battery based on magnesium vanadate hydrate with commercial-level mass loading and anti-freezing gel electrolyte
Source: Royal Society of Chemistry journal article supplement (doi:10.1039/d0ta01033b), 2020-01-01
Supplement: d0ta01033b1.pdf [file d0ta01033b1.pdf]

## Electronic Supplementary Information (ESI)

### **Environmental-adaptive quasi-solid-state zinc-ion battery based on magnesium vanadate hydrate with commercial-level mass loading and anti-freezing gel electrolyte**

Weijun Zhou,<sup>a</sup> Jizhang Chen,<sup>\*a</sup> Minfeng Chen,<sup>a</sup> Anran Wang,<sup>a</sup> Aixiang Huang,<sup>a</sup> Xinwu Xu,<sup>a</sup> Junling Xu<sup>\*b</sup> and Ching-Ping Wong<sup>bc</sup>

<sup>a</sup> *College of Materials Science and Engineering, Nanjing Forestry University, Nanjing 210037, China*

<sup>b</sup> *Department of Electronic Engineering, The Chinese University of Hong Kong, NT, Hong Kong, China*

<sup>c</sup> *School of Materials Science and Engineering, Georgia Institute of Technology, Atlanta, United States*

*E-mail addresses:* chenjizhang@njfu.edu.cn (J. Chen) and junlingxu@outlook.com (J. Xu).

## Experimental details

### *Measurements of ionic conductivity*

The ionic conductivity  $\sigma$  of PVA/G gel electrolyte at different temperatures can be estimated by EIS on a VSP-300 electrochemical workstation (Bio-Logic) with an AC amplitude of 5 mV in the frequency ranging from 100 kHz to 0.01 Hz:

$$\sigma = \frac{L}{RS} \quad (1)$$

where  $L$  and  $S$  are the thickness and area of the gel electrolyte, and  $R$  ( $\Omega$ ) represents the bulk resistance determined from the intercept of Nyquist plots with the real axis.

Supplementary figures

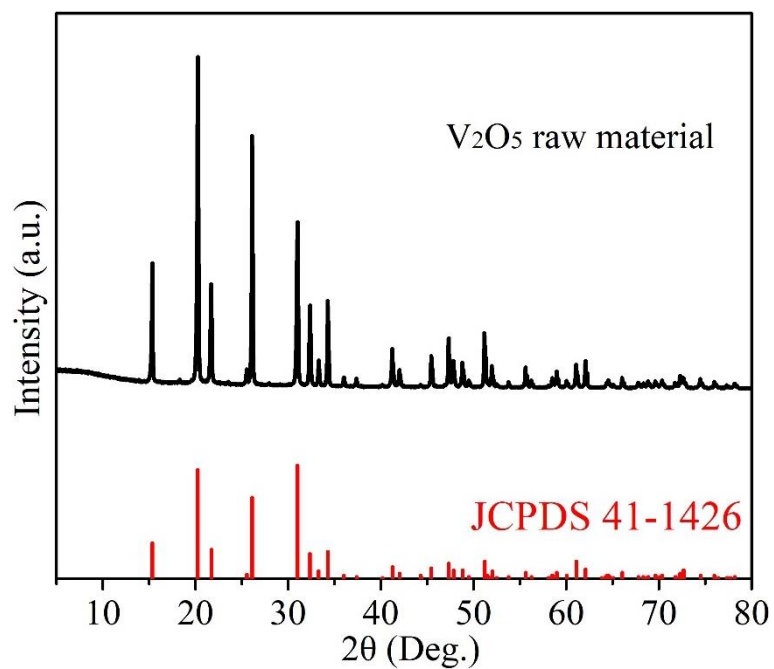

Fig. S1 XRD pattern of V<sub>2</sub>O<sub>5</sub> raw material.

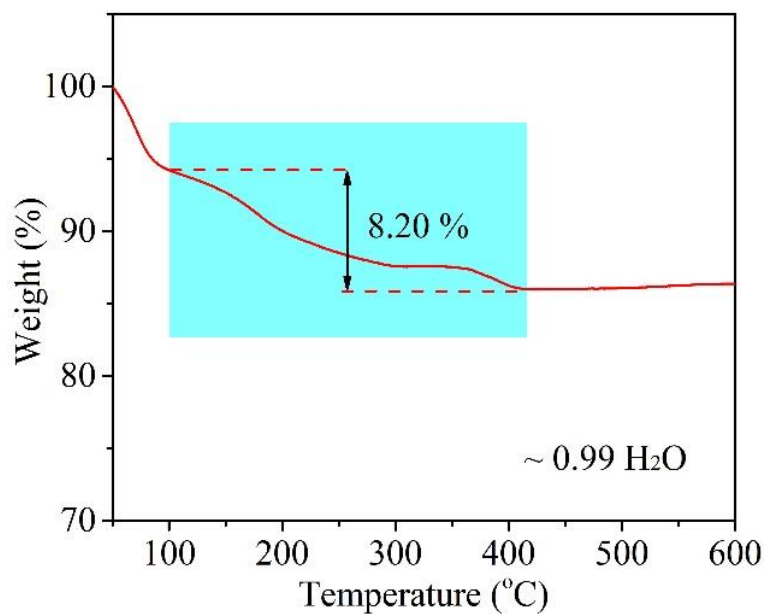

Fig. S2 TGA curve of  $\delta$ -MgVO in the Ar atmosphere.

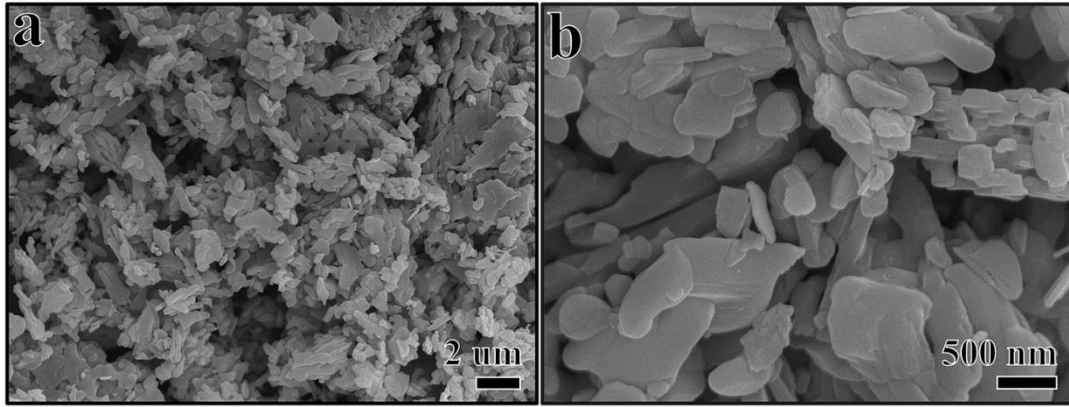

**Fig. S3** (a, b) SEM images of V<sub>2</sub>O<sub>5</sub> raw material.

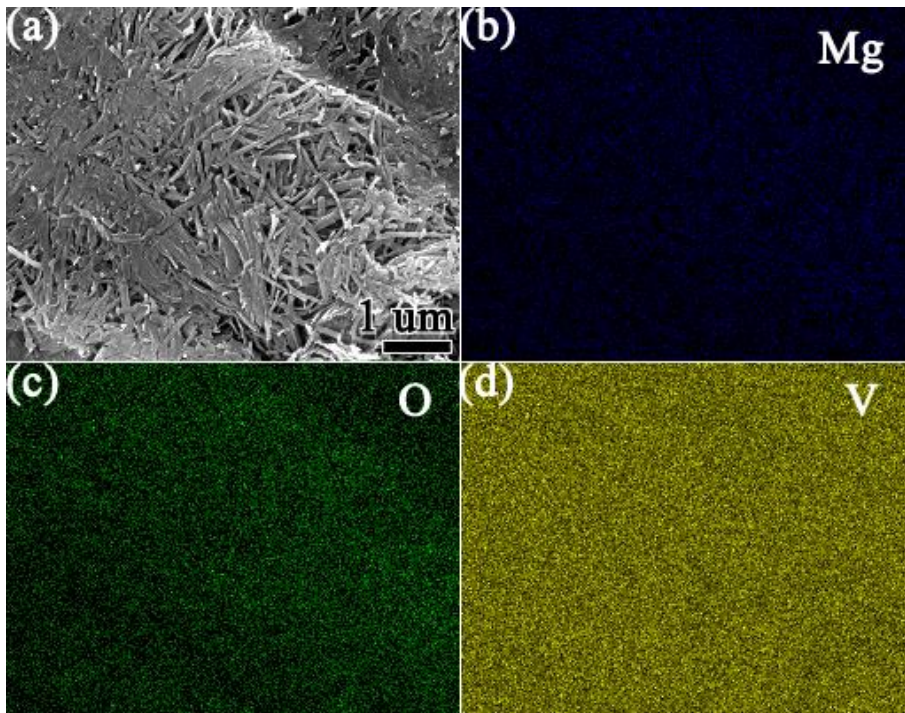

**Fig. S4** SEM-EDX mapping images of δ-MgVO.

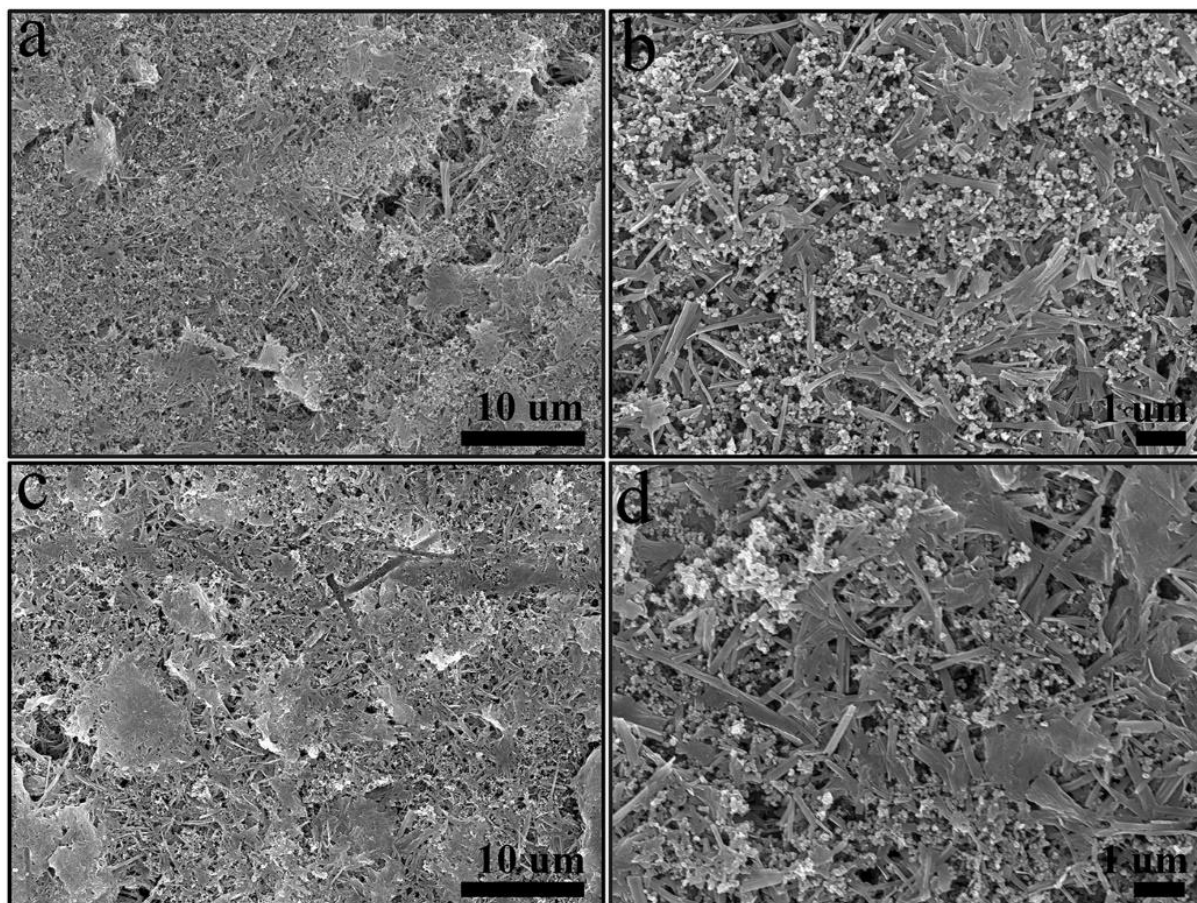

**Fig. S5** SEM images of  $\delta$ -MgVO electrodes: (a, b) before cycles and (c, d) after 5,000 cycles.

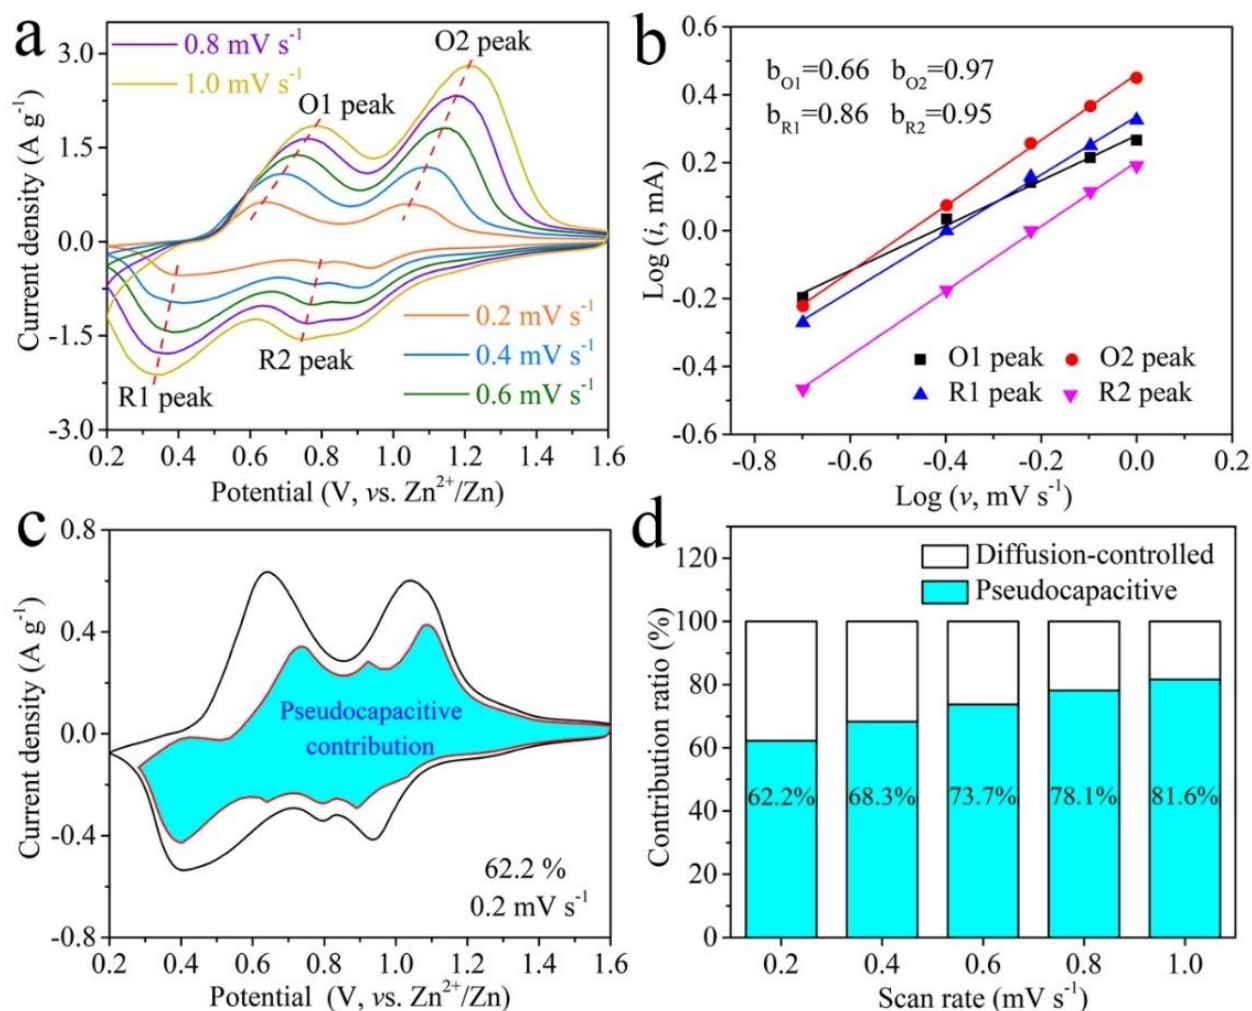

**Fig. S6** (a) CV curves of  $\delta$ -MgVO at scan rates from 0.2 to 1.0  $\text{mV s}^{-1}$ . (b)  $\log(i)$  vs.  $\log(v)$  for different redox peaks in the CV curves. (c) capacity contribution analysis of  $\delta$ -MgVO at 0.2  $\text{mV s}^{-1}$ . (d) contribution ratios of diffusion-controlled and pseudocapacitive capacities of  $\delta$ -MgVO at each scan rate.

Fig. S6a shows CV profiles of  $\delta$ -MgVO at scan rates from 0.2 to 1.0  $\text{mV s}^{-1}$ . These profiles display two couples of redox peaks, whose shapes are similar with increasing the scan rate. The general relationship between the peak current ( $i$ ) and scan rate ( $v$ ) can be described using the following equation if assuming that  $i$  obeys a power-law relationship with  $v$ :<sup>1</sup>

$$i = av^b \quad (2)$$

Generally, the  $b$  value of 0.5 and 1.0 represents diffusion-controlled and pseudocapacitive charge storage, respectively. The  $b$  values associated with four redox peaks of  $\delta$ -MgVO are fitted to be 0.66, 0.97, 0.86, and 0.95 (Fig. S6b), indicating the charge storage of  $\delta$ -MgVO is dominated by the

pseudocapacitive intercalation of electrolyte ions.<sup>2-4</sup> Furthermore, the current response  $i(V)$ , can be quantitatively divided into capacitive ( $k_1v$ ) and diffusion-controlled ( $k_2v^{1/2}$ ) parts using the following equation:

$$i(V) = k_1v + k_2v^{1/2} \quad (3)$$

By determining  $k_1$ , it is possible to calculate the fraction of current that arises from pseudocapacitive intercalation as a function of the potential. For instance, in Fig. S6c, at a scan rate of  $0.2 \text{ mV s}^{-1}$ , the shaded area represents the pseudocapacitive contribution, illustrating that the capacitor-like charge storage behavior in  $\delta\text{-MgVO}$  occurs up to 62.2%. Fig. S6d displays the diffusion-controlled and capacitive contributions to the  $i(V)$  at various scan rates. The capacitive contribution ratio increases from 62.2% to 81.6% with the scan rate increasing from  $0.2$  to  $1.0 \text{ mV s}^{-1}$ , confirming that the redox process of  $\delta\text{-MgVO}$  is dominated by the pseudocapacitive intercalation, which contributes to great rate capability of  $\delta\text{-MgVO}$  reflected in Fig. 2a.

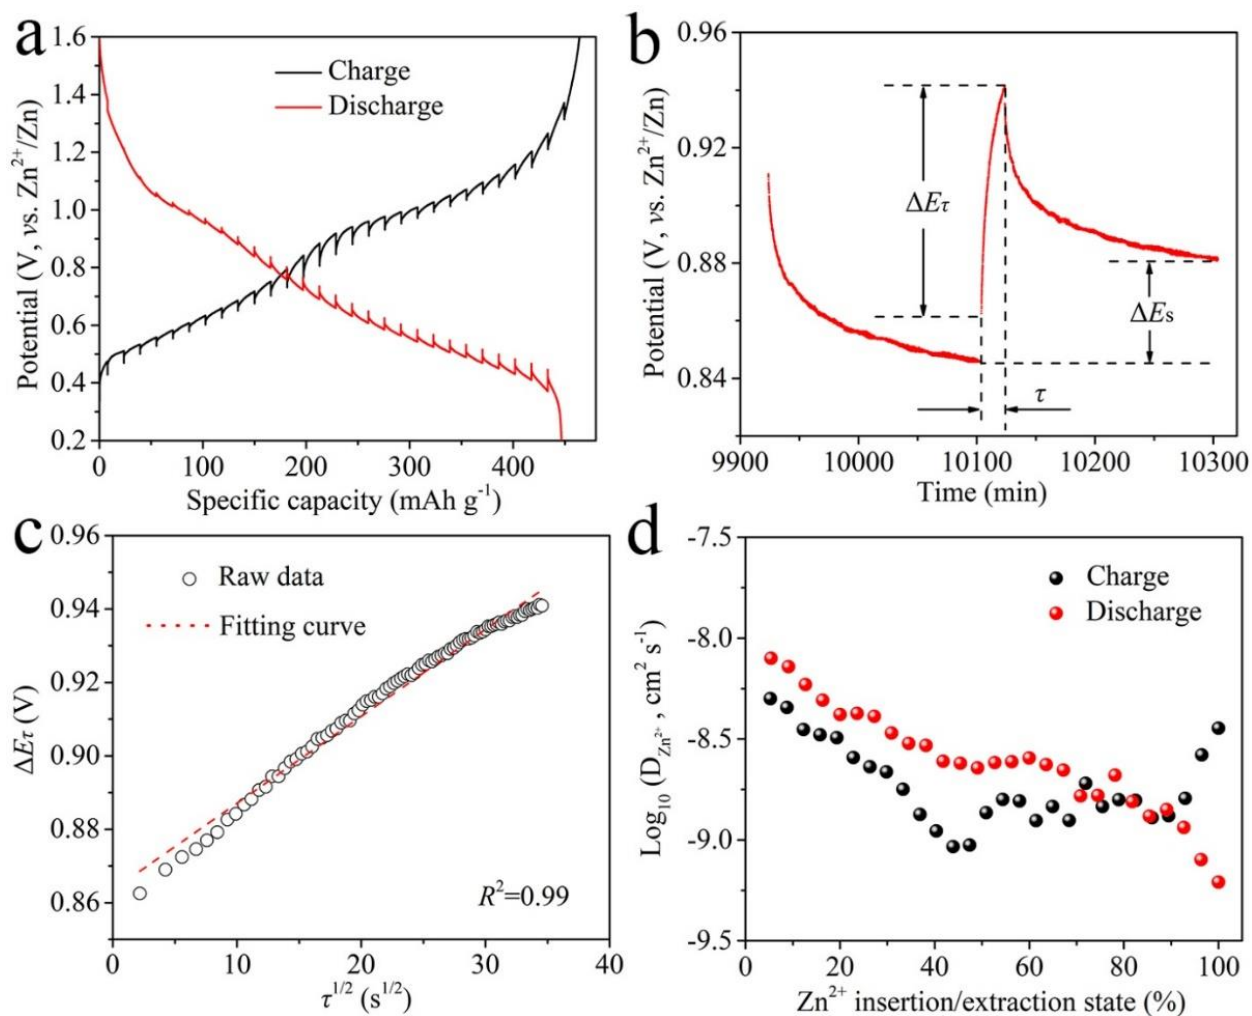

**Fig. S7** GITT measurement results of  $\delta$ -MgVO: (a) charge/discharge curves, (b) schematic illustration of a selected single step of the GITT curve during charging, (c) the linear relationship between  $\Delta E_\tau$  and  $\tau^{1/2}$ , and (d) the corresponding  $\text{Zn}^{2+}$  diffusion coefficients.

During the GITT measurement, a current pulse ( $50 \text{ mA g}^{-1}$ ) of 1,200 s followed by 3 h relaxation was applied repeatedly (Fig. S7a). The  $D_{\text{Zn}^{2+}}$  of  $\delta$ -MgVO could be calculated according to the following equation since  $\Delta E_\tau$  has a linear relationship with  $\tau^{1/2}$  (Fig. S7b,c):

$$D_{\text{Zn}^{2+}} = \frac{4}{\pi\tau} \left( \frac{n_M V_M}{S} \right)^2 \left( \frac{\Delta E_S}{\Delta E_\tau} \right)^2 \quad (4)$$

where  $\tau$  is the constant current pulse duration (1,200 s);  $n_M$  and  $V_M$  are the moles and molar volume of  $\delta$ -MgVO, respectively;  $S$  is the geometric area of  $\delta$ -MgVO electrode; and  $\Delta E_S$  and  $\Delta E_\tau$  are the change in the steady state voltage and the overall cell voltage regardless of the  $IR$ -drop during a single GITT pulse, respectively. The calculated  $D_{\text{Zn}^{2+}}$  values of  $\delta$ -MgVO at different states are plotted in Fig. S7d.



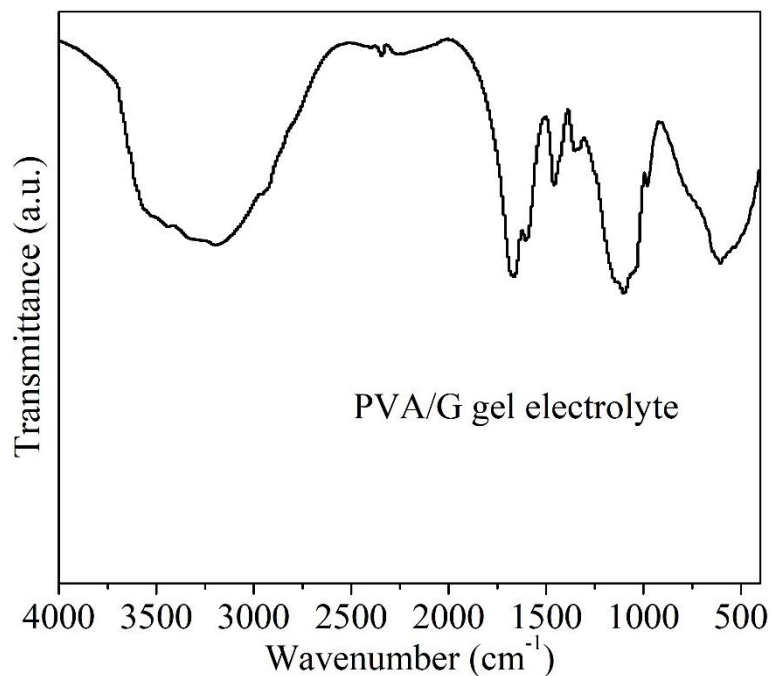

**Fig. S8** FTIR spectrum of the dried PVA/G gel electrolyte.

The bands at around 3233, 1656, 1441, 1337, 1100, and 589 cm<sup>-1</sup> are ascribed to the O–H stretching, O–H bending, symmetric CH<sub>2</sub> bending, CH<sub>2</sub> wagging, C–O stretching, and C–C stretching, respectively.

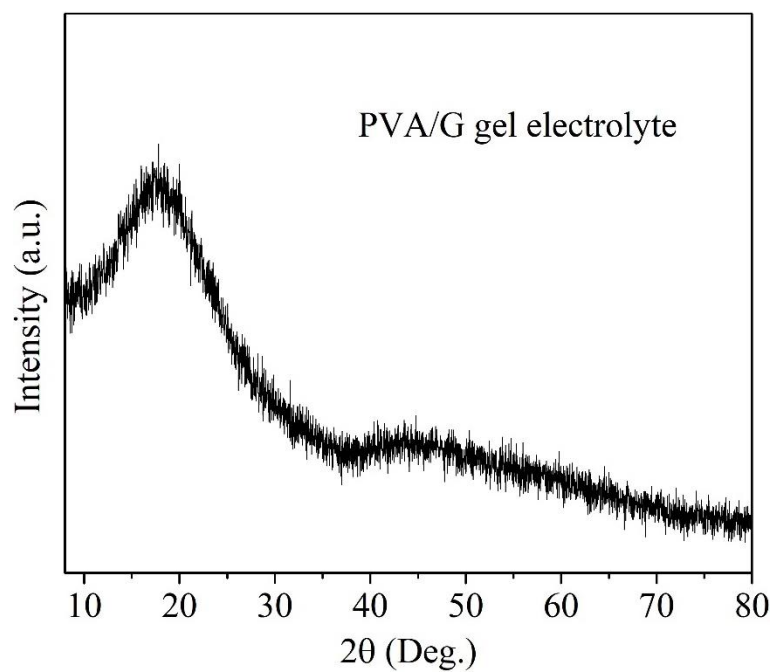

**Fig. S9** XRD pattern of the dried PVA/G gel electrolyte.

The broad peak centered at around  $18.1^\circ$  is assigned to the (101) semi-crystalline plane of PVA.

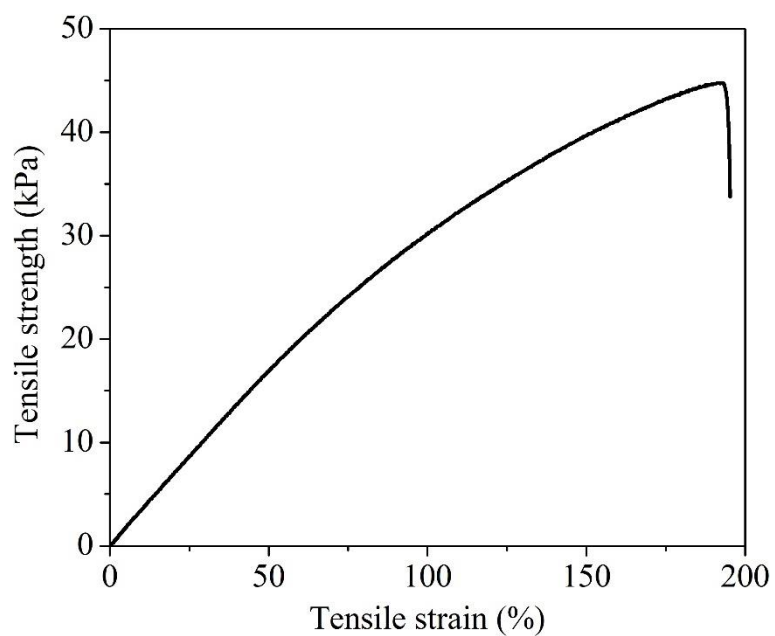

**Fig. S10** Tensile  $\sigma$ - $\varepsilon$  curve of PVA/G gel electrolyte.

**Table S1.** The ionic conductivity comparison of PVA/G gel electrolyte in this work with recently reported gel electrolytes for AZIBs. Unless specified, the ionic conductivity values from the literature were obtained at R.T..

| Gel electrolyte | Ionic conductivity (mS cm <sup>-1</sup> )       | Ref.      |
|-----------------|-------------------------------------------------|-----------|
| PVA/G           | 18.2 at 25 °C<br>14.3 at 0 °C<br>10.7 at -30 °C | This work |
| PVA             | 12.6                                            | [5]       |
| PVA-COOH        | 25.8                                            | [6]       |
| EG-waPUA/PAM    | 16.8 at 25 °C<br>14.6 at -20 °C                 | [7]       |
| PAM             | 9.1 at 25 °C<br>1.5 at -15 °C                   | [8]       |
| Xanthan gum     | 16.5 at R.T.<br>2.5 at -8 °C                    | [9]       |
| HPE             | 17.6 at R.T.                                    | [10]      |
| Fumed silica    | 8.1                                             | [11]      |
| PEO             | 2-4                                             | [12]      |
| PEO/PPO         | 6.33                                            | [13]      |
| Guar gum        | 10.7                                            | [14]      |
| Gelatin         | 6.1                                             | [15]      |
| PVDF-HFP        | 3.8                                             | [16]      |

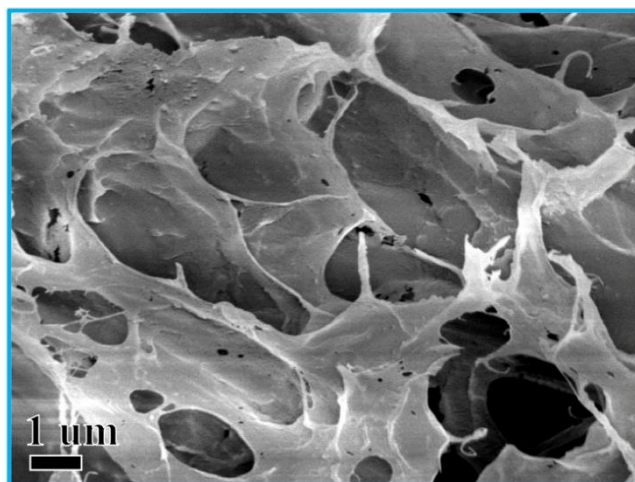

**Fig. S11** SEM image of the freeze-dried PVA/G gel electrolyte.

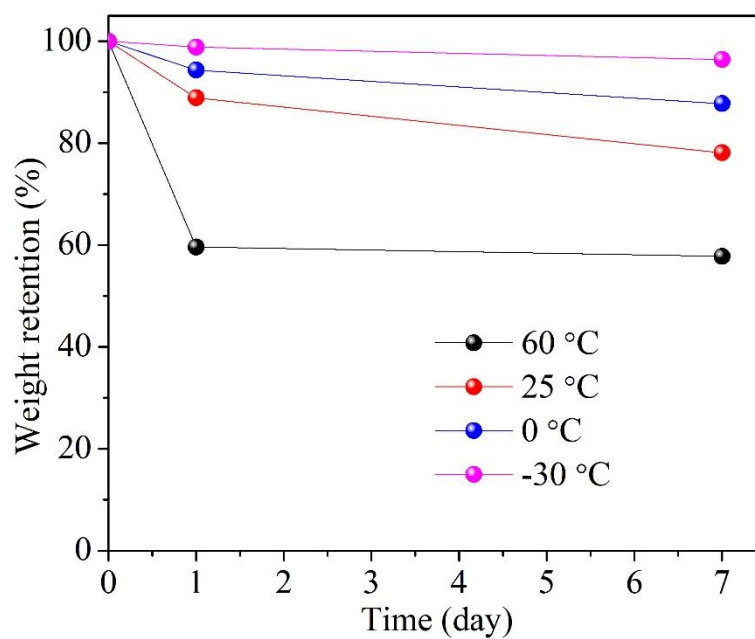

**Fig. S12** The weight retention of PVA/G gel electrolyte in the air atmosphere at different temperatures.

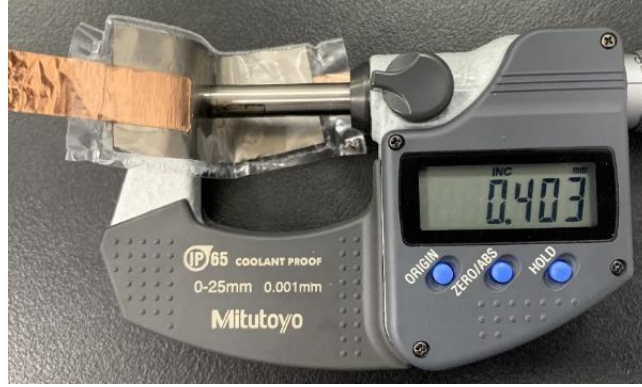

**Fig. S13** Photograph of measuring the thickness of a thin-film PVA/G Zn// $\delta$ -MgVO battery with a micrometer caliper.

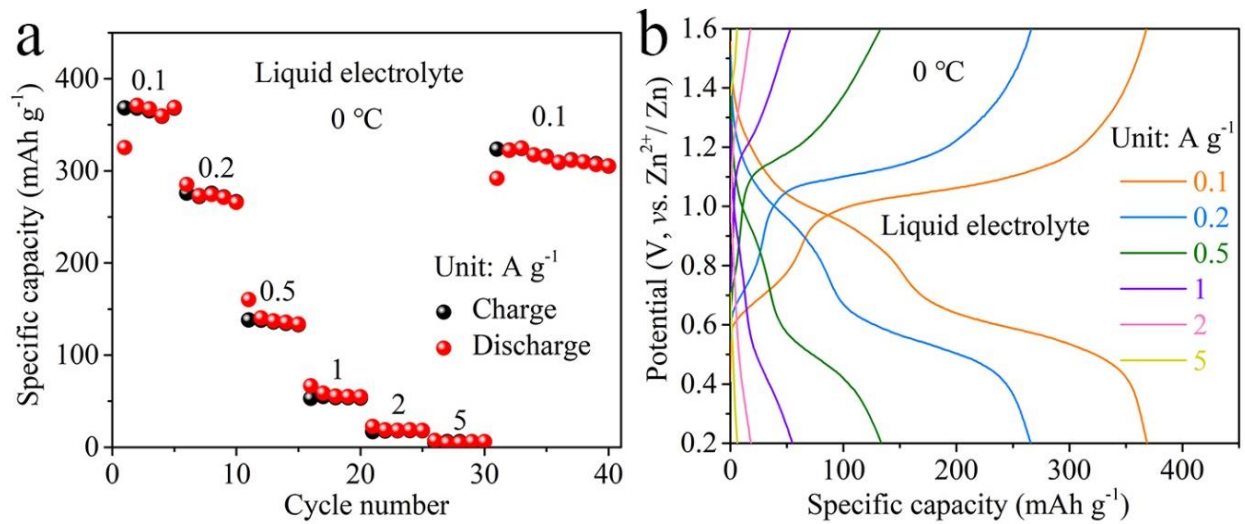

**Fig. S14** (a) Rate performance of  $\delta$ -MgVO in 1 M  $\text{Zn}(\text{CF}_3\text{SO}_3)_2$  liquid electrolyte at current densities from 0.1 to 5 A g<sup>-1</sup> at 0 °C and (b) the corresponding GCD curves.

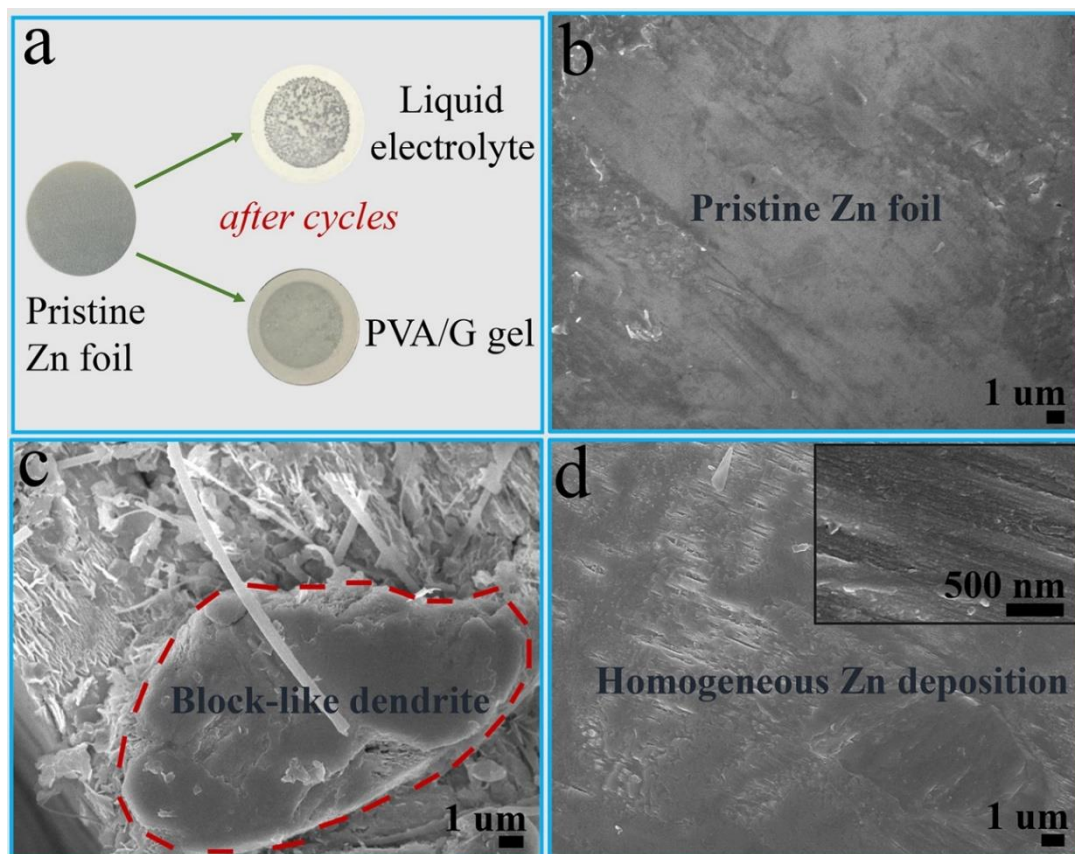

**Fig. S15** (a) Photographs of Zn foils at pristine state, with liquid electrolyte after 5,000 cycles, and with PVA/G gel electrolyte after 5,000 cycles. SEM images of (b) pristine Zn foil, (c) Zn foil with liquid electrolyte after 5,000 cycles, and (d) Zn foil with PVA/G gel electrolyte after 5,000 cycles.

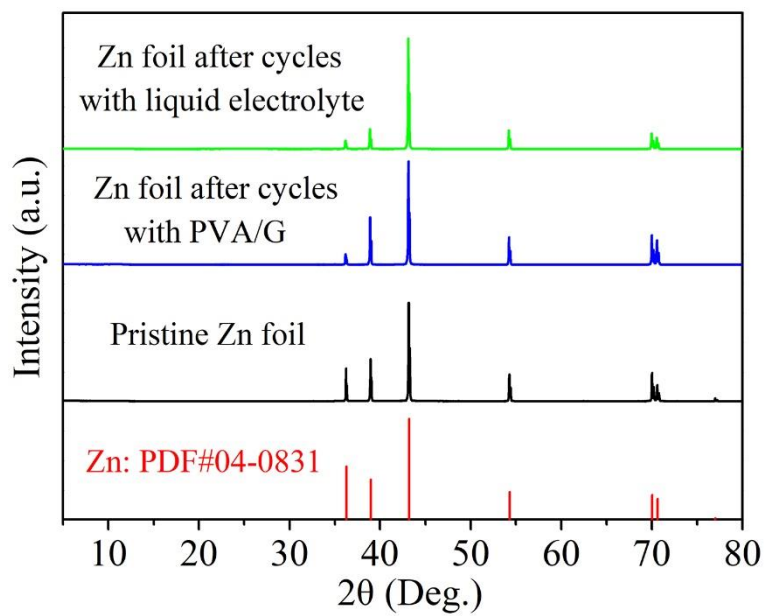

**Fig. S16** XRD patterns of the Zn foils at pristine state and after 5,000 cycles with different electrolytes.

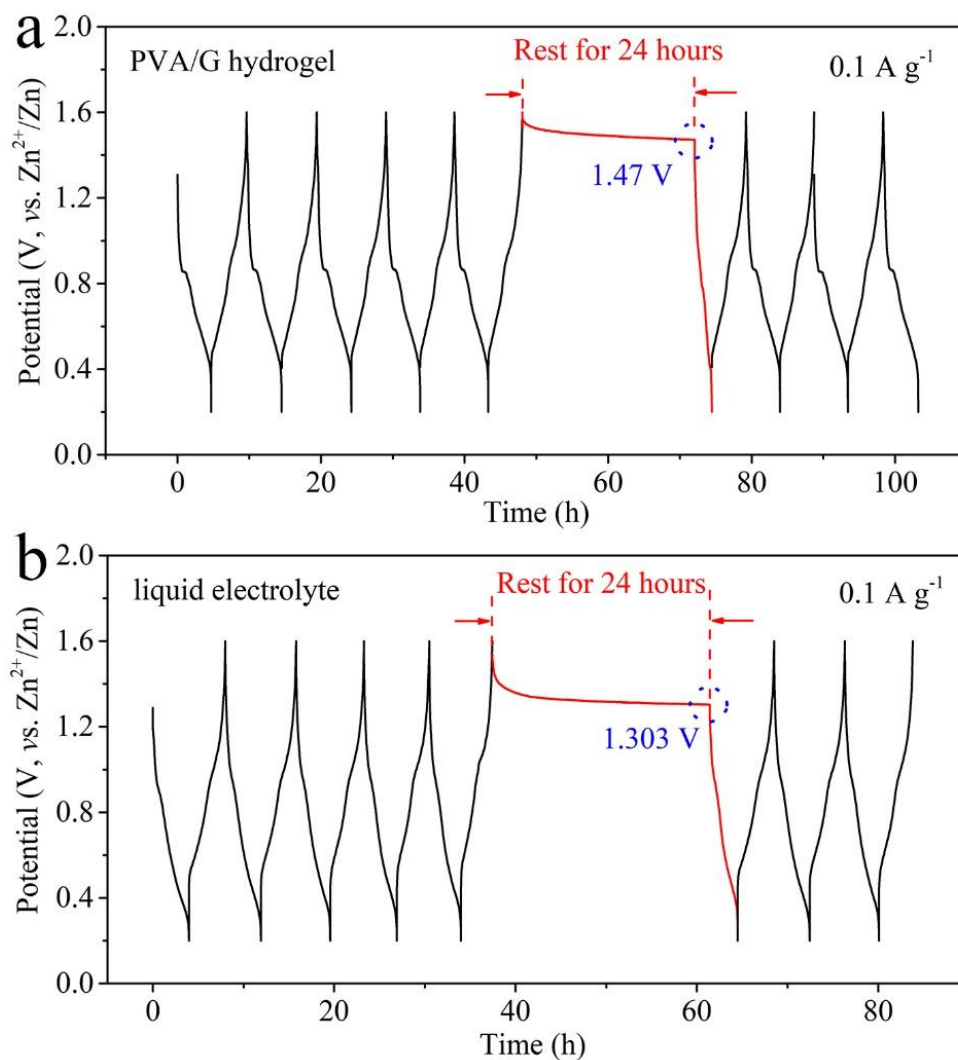

**Fig. S17** Self-discharge tests of Zn// $\delta$ -MgVO batteries: (a) with PVA-G gel electrolyte and (b) with liquid electrolyte.

The batteries were charged/discharged for five cycles at  $0.1 \text{ A g}^{-1}$ , followed by 24 h rest, and then continued to be cycled at the same current density. The open-circuit potential (OCP) of PVA/G battery and liquid-electrolyte battery drops to 1.470 and 1.303 V after the 24 h rest, respectively, indicative of slow self-discharge behavior. What's more, the PVA/G battery shows slower self-discharge behavior than the liquid-electrolyte battery. And the lost capacity is recoverable in the subsequent cycles. These results further confirm high reliability of our PVA/G battery.



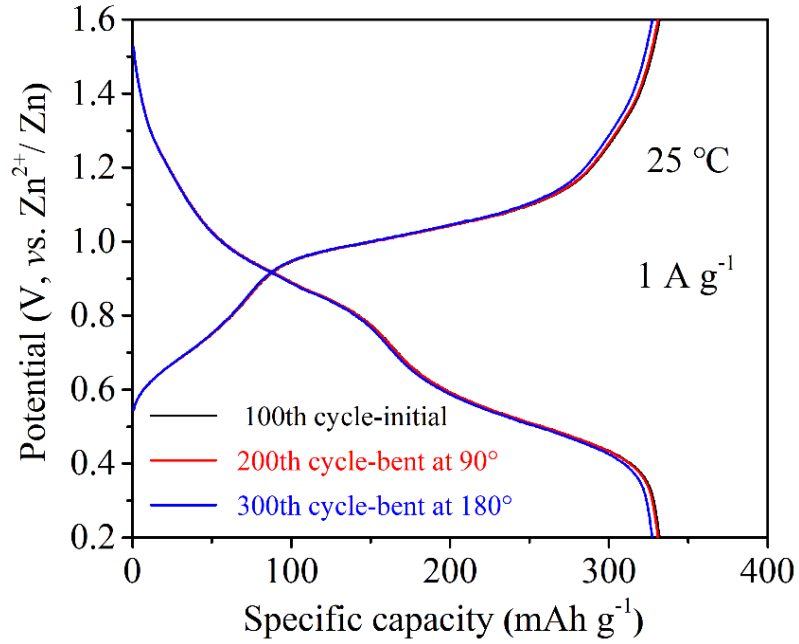

**Fig. S18** GCD curves of the thin-film PVA/G Zn// $\delta$ -MgVO battery at different bending angles (corresponding to the cycling-performance test in Fig. 6a).

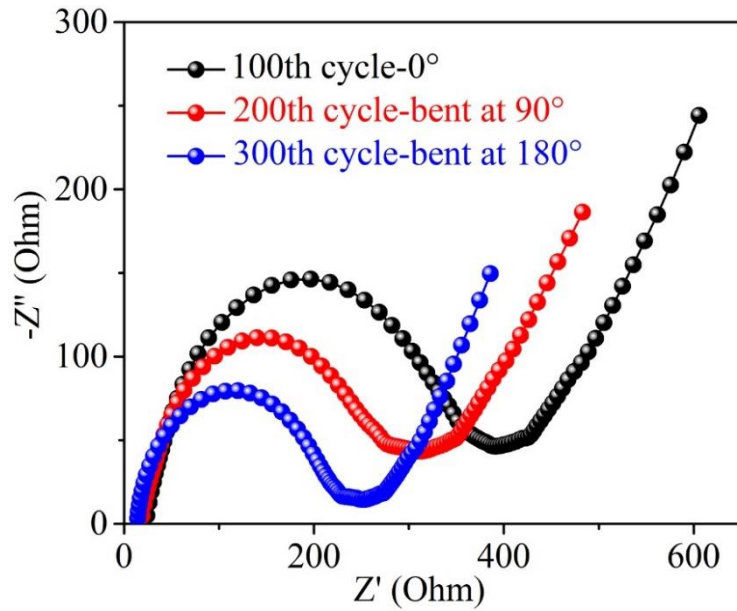

**Fig. S19** Nyquist plots of the thin-film PVA/G Zn// $\delta$ -MgVO battery after 100<sup>th</sup>, 200<sup>th</sup>, and 300<sup>th</sup> cycles at different bending angles (corresponding to the cycling-performance test in Fig. 6a).

## Supplementary videos

**Video S1** Demonstration of a thin-film PVA/G Zn// $\delta$ -MgVO battery powering an electric fan under repeated bending.

**Video S2** Demonstration of a PVA/G Zn// $\delta$ -MgVO battery sealed in solid ice (taken out from a  $-30\text{ }^{\circ}\text{C}$  high-low temperature chamber) powering an electric timer.

## References

- 1 V. Augustyn, J. Come, M. A. Lowe, J. W. Kim, P. L. Taberna, S. H. Tolbert, H. D. Abruña, P. Simon and B. Dunn, *Nat. Mater.*, 2013, **12**, 518-522..
- 2 D. Kundu, B. D. Adams, V. Duffort, S. H. Vajargah and L. F. Nazar, *Nat. Energy*, 2016, **1**, 16119.
- 3 F. Ming, H. Liang, Y. Lei, S. Kandambeth, M. Eddaoudi and H. N. Alshareef, *ACS Energy Lett.*, 2018, **3**, 2602-2609.
- 4 Y. Liu, C. Li, J. Xu, M. Ou, C. Fang, S. Sun, Y. Qiu, J. Peng, G. Lu, Q. Li, J. Han and Y. Huang, *Nano Energy*, 2020, **67**, 104211.
- 5 S. Huang, F. Wan, S. Bi, J. Zhu, Z. Niu and J. Chen, *Angew. Chem. Int. Edit.*, 2019, **58**, 4313-4317.
- 6 Q. Li, X. Cui and Q. Pan, *ACS Appl. Mater. Interf.*, 2019, **11**, 38762-38770.
- 7 F. Mo, G. Liang, Q. Meng, Z. Liu, H. Li, J. Fan and C. Zhi, *Energy Environ. Sci.*, 2019, **12**, 706-715.
- 8 X. Li, L. Ma, Y. Zhao, Q. Yang, D. Wang, Z. Huang, G. Liang, F. Mo, Z. Liu and C. Zhi, *Mater. Today Energy*, 2019, **14**, 100361.
- 9 X. Cheng, L. Zhou, Y. Lu, W. Xu, P. Zhang and X. Lu, *Electrochim. Acta*, 2018, **263**, 311-317.
- 10 H. Li, C. Han, Y. Huang, Y. Huang, M. Zhu, Z. Pei, Q. Xue, Z. Wang, Z. Liu, Z. Tang, Y. Wang, F. Kang, B. Li and C. Zhi, *Energy Environ. Sci.*, 2018, **11**, 941-951.
- 11 D. Chao, C. R. Zhu, M. Song, P. Liang, X. Zhang, N. H. Tiep, H. Zhao, J. Wang, R. Wang, H. Zhang and H. J. Fan, *Adv. Mater.*, 2018, **30**, 1803181.
- 12 A. Turković, M. Pavlović, P. Dubček, M. Lučić-Lavčević, B. Etlinger and S. Bernstorff, *J. Electrochem. Soc.*, 2007, **154**, 554-560.
- 13 J. Zhao, K. K. Sonigara, J. Li, J. Zhang, B. Chen, J. Zhang, S. S. Soni, X. Zhou, G. Cui and L. Chen, *Angew. Chem. Int. Edit.*, 2017, **56**, 7871-7875.
- 14 Y. Huang, J. Zhang, J. Liu, Z. Li, S. Jin, Z. Li, S. Zhang, H. Zhou, *Mater. Today Energy*, 2019, **14**, 100349..
- 15 Q. Han, X. Chi, S. Zhang, Y. Liu, B. Zhou, J. Yang and Y. Liu, *J. Mater. Chem. A*, 2018, **6**, 23046-23054.
- 16 J. P. T. Guisao and A. J. F. Romero, *Electrochim. Acta*, 2015, **176**, 1447-1453.
